# Supplementary material for: Key informants’ perspectives on childhood obesity in Vietnam: A qualitative study
Source: Research Square preprint supplement (doi:10.21203/rs.3.rs-279036/v1), 2021-03-12
Supplement: Supplementary file 1 [file b482833f1f267c96fc841964.pdf]

Table 1: Themes and Subthemes

| Themes                                                  | Subthemes                                                                                                   | Average Counts |
|---------------------------------------------------------|-------------------------------------------------------------------------------------------------------------|----------------|
| <b>Theme 1</b><br>Change in diet between generations    | Economic growth, globalization, and urbanization post Vietnam war                                           | 44             |
|                                                         | Change from large families and food scarcity to smaller families and food abundance                         |                |
|                                                         | Change from traditional rural diet to urbanized processed foods and fast food diet                          |                |
| <b>Theme 2</b><br>Preference for “rounder” children     | Parents define “skinny” as “unhealthy”                                                                      | 36             |
|                                                         | Parents believe boys need more food and should be “taller” and “larger”                                     |                |
|                                                         | Using endearing terms to describe overweight/obese children                                                 |                |
|                                                         | Associating “rounder” appearance with higher socioeconomic status and ability to support their family       |                |
| <b>Theme 3</b><br>Unhealthy feeding practices           | Increased frequency and overfeeding during meals and snacks                                                 | 100            |
|                                                         | Promotion of sugar-sweetened milk as healthy                                                                |                |
|                                                         | Increased access to sugar-sweetened snacks & beverages and fast food                                        |                |
| <b>Theme 4</b><br>Reduced physical activity             | Parents perceive urban environment and traffic to be unsafe for children to walk to school or play outdoors | 49             |
|                                                         | Children spend free time studying instead of playing due to increased academic pressure                     |                |
|                                                         | Increased sedentary behavior in children due to use of electronics/new technologies                         |                |
| <b>Theme 5</b><br>Increasing awareness of child obesity | Parental action to limit sweets and overfeeding to prevent overweight/obesity                               | 43             |
|                                                         | Increased parental concern about accessibility of sugar-sweetened foods and beverages at school             |                |
|                                                         | Parental hopes for increased government action to prevent overweight/obesity                                |                |
